# Supplementary material for: Simalikalactone E (SkE), a new weapon in the armamentarium of drugs targeting cancers that exhibit constitutive activation of the ERK pathway
Source: PubMed Central journal article supplement (PMC3681504; doi:10.18632/oncotarget.791), 2012-12-30
Supplement: oncotarget-03-1688-s001.pdf [file oncotarget-03-1688-s001.pdf]

**Simalikalactone E (SkE), a new weapon in the armamentarium of drugs targeting cancers that exhibit constitutive activation of the ERK pathway – Robert et al**

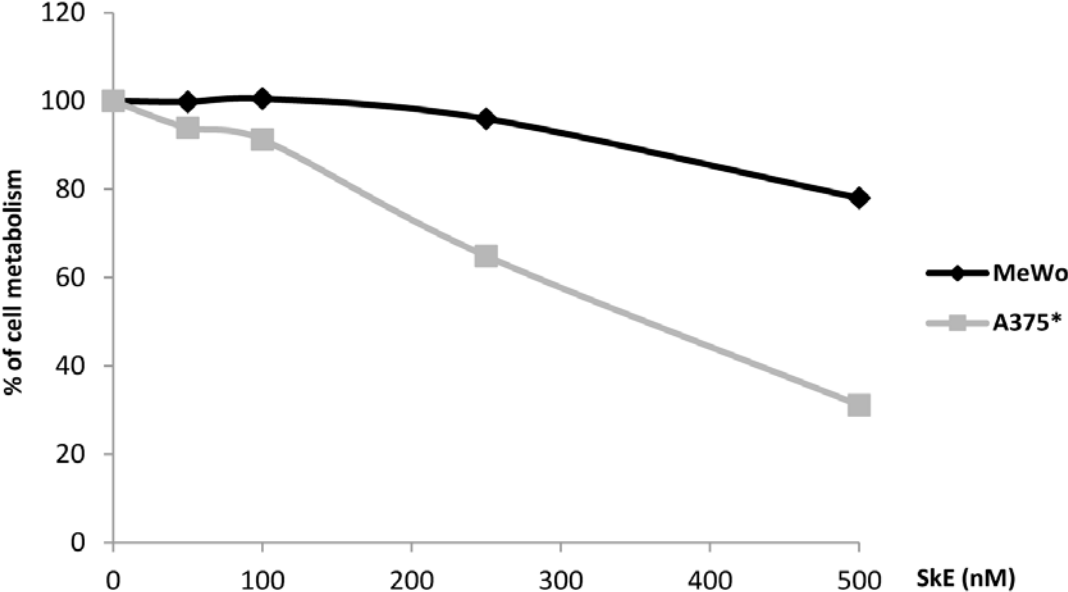

Supplementary Figure 1
